# Supplementary material for: Clinical PD-1/PD-L1 Blockades in Combination Therapies for Lymphomas
Source: MDPI journal article supplement (doi:10.3390/cancers15225399), 2023-11-14
Supplement: s1 [file s1]

**Supplementary Table S1.** The current status of clinical studies on combination therapies involving PD-1/PD-L1 blockade in lymphomas.

| <b>Diseases</b>                   | <b>NCT number</b> | <b>PD-1/PD-L1 blockade</b> | <b>Combined agents</b>                | <b>Phases</b> | <b>Study Status</b>    |
|-----------------------------------|-------------------|----------------------------|---------------------------------------|---------------|------------------------|
| <b>Classical Hodgkin lymphoma</b> |                   |                            |                                       |               |                        |
| cHL                               | NCT03233347       | Nivolumab                  | BV-AVD                                | 2             | Active, not recruiting |
| cHL                               | NCT03004833       | Nivolumab                  | AVD                                   | 2             | Active, not recruiting |
| cHL                               | NCT05772624       | Nivolumab                  | AVD                                   | 2             | Recruiting             |
| cHL                               | NCT04091490       | Nivolumab                  | DHAP                                  | 2             | Recruiting             |
| cHL                               | NCT03033914       | Nivolumab                  | A(B)VD                                | 1/2           | Recruiting             |
| cHL                               | NCT05723055       | Nivolumab                  | Axatilimab                            | 2             | Recruiting             |
| cHL                               | NCT04134325       | Nivolumab                  | CD30 CAR-T                            | 1             | Recruiting             |
| cHL                               | NCT05675410       | Nivolumab                  | ABVD or BV                            | 3             | Recruiting             |
| cHL                               | NCT02408861       | Nivolumab                  | Ipilimumab                            | 1             | Recruiting             |
| cHL                               | NCT03681561       | Nivolumab                  | Ruxolitinib                           | 1             | Active, not recruiting |
| cHL                               | NCT05039073       | Nivolumab                  | BV-AVD                                | 2             | Recruiting             |
| cHL                               | NCT02758717       | Nivolumab                  | BV                                    | 2             | Active, not recruiting |
| cHL                               | NCT03739619       | Nivolumab                  | Gemcitabine+Bendamustine              | 1/2           | Active, not recruiting |
| cHL                               | NCT03907488       | Nivolumab                  | BV-AVD                                | 3             | Active, not recruiting |
| cHL                               | NCT04938232       | Nivolumab                  | Ipilimumab                            | 2             | Recruiting             |
| cHL                               | NCT05660993       | Nivolumab                  | Bendamustine+Gemcitabine+ Vinorelbine | 2             | Recruiting             |
| cHL                               | NCT03016871       | Nivolumab                  | ICE                                   | 2             | Active, not recruiting |
| cHL                               | NCT04561206       | Nivolumab                  | BV                                    | 2             | Recruiting             |
| cHL                               | NCT03057795       | Nivolumab                  | BV                                    | 2             | Active, not recruiting |
| cHL                               | NCT03138499       | Nivolumab                  | BV                                    | 3             | Terminated             |
| cHL                               | NCT03712202       | Nivolumab                  | BV                                    | 2             | Active, not recruiting |

|     |             |               |                       |     |                        |
|-----|-------------|---------------|-----------------------|-----|------------------------|
| cHL | NCT02940301 | Nivolumab     | Ibrutinib             | 2   | Active, not recruiting |
| cHL | NCT02927769 | Nivolumab     | BV                    | 2   | Active, not recruiting |
| cHL | NCT05352828 | Nivolumab     | CD30 CAR-T            | 1   | Active, not recruiting |
| cHL | NCT04981899 | Nivolumab     | ICE                   | 1/2 | Recruiting             |
| cHL | NCT05508867 | Pembrolizumab | Favezelimab           | 3   | Recruiting             |
| cHL | NCT04788043 | Pembrolizumab | Magrolimab            | 2   | Recruiting             |
| cHL | NCT05180097 | Pembrolizumab | BV                    | 2   | Recruiting             |
| cHL | NCT04134325 | Pembrolizumab | CD30 CAR-T            | 1   | Recruiting             |
| cHL | NCT02684292 | Pembrolizumab | BV                    | 3   | Active, not recruiting |
| cHL | NCT05355051 | Pembrolizumab | Azacitidine           | 2   | Recruiting             |
| cHL | NCT03471351 | Pembrolizumab | Tenalisib             | 1   | Terminated             |
| cHL | NCT03776864 | Pembrolizumab | Umbralisib            | 2   | Terminated             |
| cHL | NCT05404945 | Pembrolizumab | BV or AVD             | 2   | Recruiting             |
| cHL | NCT03226249 | Pembrolizumab | AVD                   | 2   | Active, not recruiting |
| cHL | NCT05922904 | Pembrolizumab | BV-AVD                | 2   | Not yet recruiting     |
| cHL | NCT04510636 | Pembrolizumab | Bendamustine          | 2   | Recruiting             |
| cHL | NCT05008224 | Pembrolizumab | ABV or BEACOPP        | 2   | Active, not recruiting |
| cHL | NCT03331341 | Pembrolizumab | AVD                   | 2   | Active, not recruiting |
| cHL | NCT03077828 | Pembrolizumab | ICE                   | 2   | Active, not recruiting |
| cHL | NCT04044222 | Sintilimab    | ICE                   | 3   | Recruiting             |
| cHL | NCT05502250 | Tislelizumab  | Gemcitabine+Cisplatin | 2   | Recruiting             |
| cHL | NCT04843267 | Tislelizumab  | AVD                   | 2   | Recruiting             |
| cHL | NCT05137886 | Tislelizumab  | Decitabine            | 2   | Recruiting             |
| cHL | NCT04067037 | Camrelizumab  | AVD                   | 2   | Recruiting             |
| cHL | NCT04233294 | Camrelizumab  | Chidamide+Decitabine  | 2   | Recruiting             |
| cHL | NCT04510610 | Camrelizumab  | Chidamide+Decitabine  | 2/3 | Recruiting             |
| cHL | NCT04514081 | Camrelizumab  | Chidamide+Decitabine  | 2   | Recruiting             |
| cHL | NCT03617666 | Avelumab      | ABVD                  | 2   | Active, not recruiting |

|                        |             |               |                                                      |     |                           |
|------------------------|-------------|---------------|------------------------------------------------------|-----|---------------------------|
|                        |             |               |                                                      |     | recruiting                |
| cHL                    | NCT05300282 | Atezolizumab  | Bendamustine+Gemcitabine+<br>Vinorelbine             | 1/2 | Not yet<br>recruiting     |
| <b>B-cell lymphoma</b> |             |               |                                                      |     |                           |
| B-cell lymphoma        | NCT03995147 | Pembrolizumab | R-CHOP                                               | 2   | Recruiting                |
| B-cell lymphoma        | NCT03892525 | Atezolizumab  | Selicrelumab                                         | 1   | Terminated                |
| B-cell lymphoma        | NCT03533283 | Atezolizumab  | Glofitamab                                           | 1/2 | Recruiting                |
| B-cell lymphoma        | NCT03321643 | Atezolizumab  | R-GemOx                                              | 1   | Active, not<br>recruiting |
| DLBCL/PCNSL            | NCT03558750 | Nivolumab     | Rituximab+Lenalidomide                               | 1   | Terminated                |
| DLBCL/PMBCL            | NCT03484819 | Nivolumab     | Copanlisib Hydrochloride                             | 2   | Active, not<br>recruiting |
| DLBCL                  | NCT05385263 | Nivolumab     | CD19 CAR-T                                           | 2   | Recruiting                |
| DLBCL/FL               | NCT03401853 | Pembrolizumab | Rituximab+Obinutuzumab                               | 2   | Active, not<br>recruiting |
| DLBCL/FL               | NCT02446457 | Pembrolizumab | Rituximab+Lenalidomide                               | 2   | Recruiting                |
| DLBCL                  | NCT05221645 | Pembrolizumab | R-ICE                                                | 2   | Recruiting                |
| DLBCL                  | NCT03309878 | Pembrolizumab | Mogamulizumab                                        | 1/2 | Active, not<br>recruiting |
| DLBCL                  | NCT05280626 | Sintilimab    | R-CHOP                                               | 2   | Not yet<br>recruiting     |
| DLBCL                  | NCT04659434 | Sintilimab    | R-GemOx                                              | 2   | Not yet<br>recruiting     |
| DLBCL                  | NCT04058470 | Toripalimab   | R-CHOP                                               | 1/2 | Recruiting                |
| DLBCL                  | NCT05659628 | Tislelizumab  | CD19 CAR-T                                           | 1   | Recruiting                |
| DLBCL                  | NCT05093140 | Camrelizumab  | R-CHOP                                               | 2   | Not yet<br>recruiting     |
| DLBCL/Mantle           | NCT03440567 | Avelumab      | Utomilumab+R-ICE                                     | 1   | Active, not<br>recruiting |
| DLBCL                  | NCT02951156 | Avelumab      | Utomilumab+Rituximab±<br>azacitidine or bendamustine | 3   | Terminated                |
| DLBCL                  | NCT03244176 | Avelumab      | R-CHOP                                               | 1   | Active, not<br>recruiting |
| DLBCL/MCL/FL           | NCT03685344 | Durvalumab    | Loncastuximab Tesirine                               | 1   | Terminated                |
| DLBCL                  | NCT03422523 | Atezolizumab  | R-GemOx                                              | 2   | Terminated                |
| PMBCL                  | NCT04759586 | Nivolumab     | R-DA-EPOCH                                           | 3   | Recruiting                |
| PMBCL                  | NCT04745949 | Nivolumab     | BV-R-CHP                                             | 2   | Recruiting                |

|                                                   |             |               |                          |     |                        |
|---------------------------------------------------|-------------|---------------|--------------------------|-----|------------------------|
| PMBCL                                             | NCT05934448 | Pembrolizumab | CAR-T                    | 2   | Not yet recruiting     |
| PMBCL                                             | NCT04705129 | Tislelizumab  | Zanubrutinib             | 2   | Recruiting             |
| PCNSL                                             | NCT04609046 | Nivolumab     | Lenalidomide             | 1   | Recruiting             |
| PCNSL                                             | NCT03770416 | Nivolumab     | Ibrutinib                | 2   | Active, not recruiting |
| PCNSL                                             | NCT04421560 | Pembrolizumab | Ibrutinib+Rituximab      | 1/2 | Recruiting             |
| PCNSL                                             | NCT04961515 | Sintilimab    | Orelabrutinib            | 1/2 | Recruiting             |
| PCNSL                                             | NCT04899427 | Sintilimab    | Orelabrutinib            | 2   | Recruiting             |
| PCNSL                                             | NCT04899427 | Tislelizumab  | Orelabrutinib            | 2   | Recruiting             |
| PCNSL                                             | NCT04688151 | Durvalumab    | Rituximab+Acalabrutinib  | 1   | Not yet recruiting     |
| PCNSL                                             | NCT04462328 | Durvalumab    | Acalabrutinib            | 1   | Recruiting             |
| Aggressive B-cell lymphoma                        | NCT03038672 | Nivolumab     | Varlilumab               | 2   | Active, not recruiting |
| Aggressive B-cell lymphoma                        | NCT03749018 | Nivolumab     | DA-EPOCH-R               | 2   | Active, not recruiting |
| High-grade B-cell Lymphoma                        | NCT03620578 | Nivolumab     | DA-EPOCH-R               | 2   | Active, not recruiting |
| FL                                                | NCT03245021 | Nivolumab     | Rituximab                | 1   | Active, not recruiting |
| FL                                                | NCT04962126 | Atezolizumab  | Obinutuzumab             | 2   | Active, not recruiting |
| Indolent Lymphoma                                 | NCT04431635 | Nivolumab     | Copanlisib               | 1   | Active, not recruiting |
| CLL                                               | NCT03204188 | Pembrolizumab | Ibrutinib+Fludarabine    | 2   | Active, not recruiting |
| CLL/MCL                                           | NCT03153202 | Pembrolizumab | Ibrutinib                | 1/2 | Recruiting             |
| CLL/Richter                                       | NCT04781855 | Nivolumab     | Ipilimumab+Ibrutinib     | 1   | Recruiting             |
| CLL/Richter                                       | NCT05388006 | Durvalumab    | Acalabrutinib+Venetoclax | 2   | Recruiting             |
| CLL/Richter                                       | NCT02846623 | Atezolizumab  | Obinutuzumab+Venetoclax  | 2   | Recruiting             |
| Richter syndrome or transformed FL                | NCT03892044 | Nivolumab     | Duvelisib                | 1   | Active, not recruiting |
| Richter syndrome or transformed indolent lymphoma | NCT03884998 | Nivolumab     | Copanlisib               | 1   | Recruiting             |

| <b>T-cell lymphoma</b>            |             |               |                                     |     |                        |
|-----------------------------------|-------------|---------------|-------------------------------------|-----|------------------------|
| PTCL                              | NCT03927105 | Nivolumab     | Cabiralizumab                       | 2   | Active, not recruiting |
| PTCL                              | NCT03586999 | Nivolumab     | DA-EPOCH                            | 1/2 | Active, not recruiting |
| PTCL                              | NCT05313243 | Pembrolizumab | BV                                  | 2   | Recruiting             |
| PTCL                              | NCT03278782 | Pembrolizumab | Romidepsin                          | 1/2 | Active, not recruiting |
| PTCL                              | NCT04795869 | Pembrolizumab | BV                                  | 2   | Active, not recruiting |
| PTCL                              | NCT03598998 | Pembrolizumab | Pralatrexate                        | 1/2 | Active, not recruiting |
| PTCL                              | NCT04052659 | Sintilimab    | Chidamide+Azacitidine               | 2   | Not yet recruiting     |
| PTCL                              | NCT04512534 | Sintilimab    | Chidamide                           | 2   | Recruiting             |
| PTCL/CTCL                         | NCT03240211 | Pembrolizumab | Decitabine+Pralatrexate             | 1   | Recruiting             |
| PTCL/CTCL                         | NCT03011814 | Durvalumab    | Lenalidomide                        | 1/2 | Recruiting             |
| CTCL                              | NCT05956041 | Pembrolizumab | Mogamulizumab                       | 2   | Not yet recruiting     |
| CTCL                              | NCT04296786 | Sintilimab    | Chidamide                           | 2   | Recruiting             |
| Mycosis Fungoides/Sezary Syndrome | NCT04960618 | Pembrolizumab | Gemcitabine                         | 2   | Recruiting             |
| Mycosis Fungoides/Sezary Syndrome | NCT03063632 | Pembrolizumab | Interferon-gamma                    | 2   | Active, not recruiting |
| NK/T-cell lymphoma                | NCT02535247 | Pembrolizumab | Copanlisib                          | 1/2 | Terminated             |
| NK/T-cell lymphoma                | NCT04365036 | Toripalimab   | Pegaspargase-GemOx                  | 3   | Recruiting             |
| NK/T-cell lymphoma                | NCT04899414 | Tislelizumab  | Azacytidine+Pegaspargase            | 2   | Not yet recruiting     |
| NK/T-cell lymphoma                | NCT05464433 | Tislelizumab  | Mitoxantrone Hydrochloride Liposome | 1/2 | Recruiting             |
| NK/T-cell lymphoma                | NCT05316246 | Tislelizumab  | BV                                  | 2   | Not yet recruiting     |
| NK/T-cell                         | NCT05058755 | Tislelizumab  | Azacytidine+Lenalidomide            | NA  | Recruiting             |

|                          |             |               |                                             |     |                        |
|--------------------------|-------------|---------------|---------------------------------------------|-----|------------------------|
| lymphoma                 |             |               |                                             |     |                        |
| NK/T-cell lymphoma       | NCT05254899 | Tislelizumab  | Pegaspargase-GemOx                          | 2   | Recruiting             |
| NK/T-cell lymphoma       | NCT04366128 | Camrelizumab  | Pegaspargase+Apatinib+RT                    | NA  | Recruiting             |
| NK/T-cell lymphoma       | NCT04994210 | Sintilimab    | Chidamide                                   | 2   | Recruiting             |
| NK/T-cell lymphoma       | NCT04676789 | Sintilimab    | Pegaspargase                                | 2   | Not yet recruiting     |
| NK/T-cell lymphoma       | NCT04127227 | Sintilimab    | Pegaspargase+GemOx                          | 2   | Recruiting             |
| <b>Lymphoid neoplasm</b> |             |               |                                             |     |                        |
| Lymphoma                 | NCT03502733 | Nivolumab     | Ipilimumab                                  | 1   | Active, not recruiting |
| Lymphoma                 | NCT01703949 | Nivolumab     | BV                                          | 2   | Recruiting             |
| Lymphoma                 | NCT03015896 | Nivolumab     | Lenalidomide                                | 1/2 | Active, not recruiting |
| Lymphoma                 | NCT03366272 | Nivolumab     | R-GemOx                                     | 2/3 | Active, not recruiting |
| Lymphoma                 | NCT05255601 | Nivolumab     | Relatlimab                                  | 1/2 | Recruiting             |
| Lymphoma                 | NCT03150329 | Pembrolizumab | Vorinostat                                  | 1   | Active, not recruiting |
| Lymphoma                 | NCT03179930 | Pembrolizumab | Entinostat                                  | 2   | Recruiting             |
| Lymphoma                 | NCT03598608 | Pembrolizumab | Favezelimab                                 | 1/2 | Recruiting             |
| Lymphoma                 | NCT02875067 | Pembrolizumab | Lenalidomide                                | 1/2 | Terminated             |
| Lymphoma                 | NCT02362035 | Pembrolizumab | Acalabrutinib                               | 1/2 | Active, not recruiting |
| Lymphoma                 | NCT05320081 | Camrelizumab  | CD30 CAR-T                                  | 2   | Recruiting             |
| Lymphoma                 | NCT03636503 | Avelumab      | Utomilumab+Rituximab                        | 1   | Active, not recruiting |
| Lymphoma                 | NCT03161223 | Durvalumab    | Pralatrexate+Romidepsin+ Oral 5-Azacitidine | 1/2 | Recruiting             |
| Lymphoma                 | NCT02500407 | Atezolizumab  | Mosunetuzumab                               | 1/2 | Active, not recruiting |

Abbreviations: cHL, classical Hodgkin lymphoma; DLBCL, diffuse large B-cell lymphoma; PMBCL, primary mediastinal B-cell lymphoma; PCNSL, primary central nervous system lymphoma, FL, follicular lymphoma; CLL, chronic lymphocytic leukemia; MCL, mantle cell lymphoma; PTCL, peripheral T-cell lymphoma; CTCL,

cutaneous T cell lymphoma; BV, brentuximab vedotin; AVD, doxorubicin, vinblastine, and dacarbazine; ICE, ifosfamide, carboplatin, and etoposide; DHAP, dexamethasone, high dose cytarabine, and cisplatin; CAR-T, chimeric antigen receptor T-cell; R, rituximab; CHOP, cyclophosphamide, doxorubicin, vincristine, and prednisolone; GemOx, gemcitabine and oxaliplatin; DA-EPOCH, dose adjusted-cyclophosphamide, doxorubicin, etoposide, vincristine, and prednisolone; RT, radiotherapy; NA, not available
